# Supplementary material for: Endometriosis and Phytoestrogens: Friends or Foes? A Systematic Review
Source: MDPI journal article supplement (doi:10.3390/nu13082532), 2021-07-24
Supplement: s1 [file s1]

**Supplementary Figure S1:** Risk of bias assessment according to the risk of bias tool by Clarity Group [79].

| Study                             | Risk of bias domains |    |    |    |    | Overall |
|-----------------------------------|----------------------|----|----|----|----|---------|
|                                   | D1                   | D2 | D3 | D4 | D5 |         |
| Nagata et al., 2001 [18]          | +                    | +  | +  | -  | -  | +       |
| Cotroneo et al., 2001 [19]        | +                    | +  | +  | +  | +  | +       |
| Edmunds et al., 2005 [20]         | +                    | +  | +  | +  | -  | +       |
| Tsuchiya et al., 2007 [21]        | +                    | +  | +  | +  | -  | +       |
| Yavuz et al., 2007 [22]           | +                    | +  | +  | +  | +  | +       |
| Laschke et al., 2008 [23]         | +                    | +  | +  | +  | +  | +       |
| Xu et al., 2009 [24]              | +                    | +  | +  | +  | +  | +       |
| Laschke et al., 2010 [25]         | +                    | +  | -  | -  | -  | -       |
| Bruner-Tran et al., 2011 [26]     | +                    | +  | +  | +  | +  | +       |
| Chen et al., 2011 [27]            | +                    | +  | +  | +  | +  | +       |
| Wang et al., 2011 [28]            | +                    | +  | +  | +  | +  | +       |
| Xu et al., 2011 [29]              | +                    | +  | +  | +  | +  | +       |
| Cheng et al., 2012 [30]           | +                    | +  | +  | +  | +  | +       |
| Maia et al., 2012 [31]            | +                    | +  | +  | +  | -  | +       |
| Rudzitis-Auth et al., 2012 [32]   | +                    | +  | +  | +  | +  | +       |
| Ergenoglu et al., 2013 [33]       | +                    | +  | +  | +  | +  | +       |
| Ji et al., 2013 [34]              | +                    | +  | +  | +  | +  | +       |
| Ricci et al., 2013 [35]           | +                    | +  | +  | +  | +  | +       |
| Rudzitis-Auth et al., 2013 [36]   | +                    | +  | +  | +  | +  | +       |
| Wang et al., 2013 [37]            | +                    | +  | +  | +  | +  | +       |
| Amaya et al., 2014 [38]           | +                    | +  | +  | +  | +  | +       |
| Demirel et al., 2014 [39]         | +                    | +  | +  | +  | +  | +       |
| Matsuzaki et al., 2014 [40]       | +                    | +  | +  | +  | +  | +       |
| Taguchi et al., 2014 [41]         | +                    | +  | +  | +  | +  | +       |
| Yavuz et al., 2014 [42]           | +                    | +  | +  | +  | +  | +       |
| Bayoglu Tekin et al., 2015 [43]   | -                    | +  | -  | -  | -  | -       |
| Ozcan Cenksoy et al., 2015 [44]   | +                    | +  | +  | +  | +  | +       |
| Singh et al., 2015 [45]           | +                    | +  | +  | +  | +  | +       |
| Di Paola et al., 2016 [46]        | +                    | +  | +  | +  | +  | +       |
| Taguchi et al., 2016 [47]         | +                    | +  | +  | +  | +  | +       |
| Kim et al., 2017 [48]             | +                    | +  | +  | +  | +  | +       |
| Mendes Da Silva et al., 2017 [49] | +                    | +  | +  | +  | +  | +       |
| Park et al., 2017 [50]            | +                    | +  | +  | +  | +  | +       |
| Ferreira et al., 2018 [51]        | +                    | -  | +  | +  | +  | +       |
| Jouhari et al., 2018 [52]         | +                    | +  | +  | +  | +  | +       |
| Melekoglu et al., 2018 [53]       | +                    | +  | +  | +  | +  | +       |
| Nahari et al., 2018 [54]          | +                    | +  | +  | +  | +  | +       |
| Park et al., 2018 [55]            | +                    | +  | +  | +  | +  | +       |
| Signorile et al., 2018 [56]       | -                    | -  | +  | +  | -  | -       |
| Takaoka et al., 2018 [57]         | +                    | +  | -  | -  | -  | -       |
| Wei et al., 2018 [58]             | +                    | +  | +  | +  | +  | +       |
| Arablou et al., 2019 [59]         | +                    | +  | +  | +  | +  | +       |
| Ding et al., 2019 [60]            | +                    | +  | +  | +  | +  | +       |
| Ham et al., 2019 [61]             | +                    | +  | +  | +  | +  | +       |
| Ilhan et al., 2019 [62]           | +                    | +  | +  | +  | +  | +       |
| Ilhan et al., 2019 [63]           | +                    | +  | +  | +  | +  | +       |
| Kapoor et al., 2019 [64]          | +                    | -  | -  | -  | -  | -       |
| Kodarahmian et al., 2019 [65]     | +                    | +  | +  | +  | +  | +       |
| Ryu et al., 2019 [66]             | +                    | +  | +  | +  | +  | +       |
| Park et al., 2019 [67]            | +                    | +  | +  | +  | +  | +       |
| Park et al., 2019 [68]            | +                    | +  | +  | +  | +  | +       |
| Park et al., 2019 [69]            | +                    | +  | +  | +  | +  | +       |
| Bina et al., 2020 [70]            | +                    | +  | +  | +  | +  | +       |
| Hernandes et al., 2020 [71]       | +                    | +  | +  | +  | +  | +       |
| Hsu et al., 2020 [72]             | +                    | +  | +  | +  | +  | +       |
| Ilhan et al., 2020 [73]           | +                    | +  | +  | +  | +  | +       |
| Khazaei et al., 2020 [74]         | +                    | +  | +  | +  | +  | +       |
| Park et al., 2020 [75]            | +                    | +  | +  | +  | +  | +       |
| Park et al., 2020 [76]            | +                    | +  | +  | +  | +  | +       |
| Youseflu et al., 2020 [77]        | -                    | -  | +  | +  | -  | -       |

**Legend:** The risk of bias was assigned according to the following domains: D1) Can we be confident in the assessment of exposure?; D2) Can we be confident that cases had developed the outcome of interest and controls had not?; D3) Were the cases properly selected?; D4) Were the controls properly selected?; D5) Were cases and controls matched according to important prognostic variables or was statistical adjustment carried out for those variables?. We graded each potential source of bias as Definitely yes (low risk of bias), Probably yes (Moderate risk of bias), Probably no (Serious risk of bias), or Definitely no (Critical, high risk of bias).
